# Supplementary material for: Development and Validation of an Instrument to Assess Nursing Team Contexts and Competencies regarding Continuous Quality Improvement Culture
Source: Research Square preprint supplement (doi:10.21203/rs.3.rs-7246729/v1), 2025-09-16
Supplement: Supplementary file 1 [file bbc2759ec7cad52df88a98e3.docx]

| Supplementary file 3: Factor loadings for four exploratory factor analyses using Principal Axis Factoring with Direct Oblim rotation | | | | |
| --- | --- | --- | --- | --- |
| Construct and survey item | **Factor loadings** | | | |
| PAF1: Motivation & Trigger | **Factor 1** | **Factor 2** |  |  |
| 1. Pressures or other incentives from outside hospital motivate team to start QIP | **.58** |  |  |  |
| 1. Evidence or best practices used to design QIP, tailored to ward context | **.50** |  |  |  |
| 1. Relevant data create support for QIP |  | **.76** |  |  |
| 1. Majority of team is highly motivated to improve care | **.80** |  |  |  |
| 1. QI projects are relevant to practice |  | **.76** |  |  |
| PAF2: Continuous improvement at ward level | **Factor 1** | **Factor 2** |  |  |
| 1. Evidence or best practices used to implement and evaluate QIP, tailored to ward context | **.39*** |  |  |  |
| 1. QIP follow cyclical process until objective is achieved | **.40*** | .34 |  |  |
| 1. QIP are first tested on limited scale | **.79** |  |  |  |
| 1. During QIP objective or expected outcome is set so that results can be evaluated | **.52** |  |  |  |
| 1. During QIP results are frequently measured to understand impact of changes | **.66** |  |  |  |
| 1. Results QIP are communicated & discussed within team, and changes are made based on results | **.51** | .35 |  |  |
| 1. Relevant information is documented & communicated |  | **.48*** |  |  |
| 1. Learning & improving is essential part of daily work team |  | **.50** |  |  |
| 1. Team effectively use QI methods |  | **.62** |  |  |
| 1. Majority of team participated in QIP |  | **.64** |  |  |
| 1. During QIP, members with knowledge of process or outcome of QIP is involved |  | **.88** |  |  |
| PAF3: context at ward level | **Factor 1** | **Factor 2** | **Factor 3** | **Factor 4** |
| 1. Manager thinks long-term and systemic | **-.78** |  |  |  |
| 1. Manager aligns team objectives with organisational goals | **-.81** |  |  |  |
| 1. Manager fosters QI culture | **-.73** |  |  |  |
| 1. Manager is involved in QIP | **-.79** |  |  |  |
| 1. Manager allocates time for and support QIP | **-.75** |  |  |  |
| 1. Collaboration within team is characterised by trust |  | **.83** |  |  |
| 1. Collaboration within team is characterised by teamwork |  | **.88** |  |  |
| 1. Collaboration within team is characterised by willingness to help each other |  | **.89** |  |  |
| 1. Collaboration within team is characterised by appreciation of complementary roles |  | **.42*** |  |  |
| 1. Collaboration within team is characterised by recognition individual contributions to shared purpose |  | **.49*** |  |  |
| 1. Team members value communication & commitment for QIP |  | **.35*** |  |  |
| 1. Team members are recognised for improving care |  |  | **.36*** |  |
| 1. Appreciate each other & use differences for benefit of team |  | .35 | **.47*** |  |
| 1. Team listen to contribution of every member |  |  | **.89** |  |
| 1. Contribution team member will be considered |  |  | **.82** |  |
| 1. Different ideas are considered before decision |  |  | **.61** |  |
| 1. Working group or reference nurses are given & take responsibility during QIP |  |  |  | **.74** |
| 1. Working group or reference nurses may make decision during QIP |  |  |  | **.71** |
| 1. Working group or reference nurses provide feedback and support to team during QIP |  |  |  | **.82** |
| 1. Working group or reference nurses apply sufficient knowledge and skills to carry out QIP |  |  |  | **.90** |
| PAF4: context in the organisation | **Factor 1** | **Factor 2** |  |  |
| 1. Management and nurse middle managers encourage team to execute QIP | **.76** |  |  |  |
| 1. Management and nurse middle managers share information with team and between teams to execute QIP | **.87** |  |  |  |
| 1. Management and nurse middle managers provide sufficient time and resources to team for QIP | **.67** |  |  |  |
| 1. Management and nurse middle managers offer recognition & rewards to team for implementation QIP | **.66** |  |  |  |
| 1. Team members receive QI education and training |  | **.36*** |  |  |
| 1. Organisation have system for data collection & management |  |  |  |  |
| 1. Data for QIP are available & accessible |  | **.64** |  |  |
| 1. Our organisation provides support by deploying QI experts |  | **.83** |  |  |

Factor loadings smaller than .30 are suppressed

* = Factor loadings between .30 & .50
