# Supplementary material for: Development and Validation of an Instrument to Assess Nursing Team Contexts and Competencies regarding Continuous Quality Improvement Culture
Source: Research Square preprint supplement (doi:10.21203/rs.3.rs-7246729/v1), 2025-09-16
Supplement: Supplementary file 2 [file bbf87383987ae34cc1f83161.docx]

| Supplementary file 2: Communalities for four exploratory factor analyses using Principal Axis Factoring with Direct Oblim rotation | |
| --- | --- |
| Construct and survey item | **Communalities** |
| PAF1: Motivation & Trigger | |
| 1. Pressures or other incentives from outside hospital motivate team to start QIP | .34* |
| 1. Evidence or best practices used to design QIP, tailored to ward context | .27* |
| 1. Relevant data create support for QIP | .60 |
| 1. Majority of team is highly motivated to improve care | .63 |
| 1. QIP are relevant to practice | .58 |
| PAF2: Continuous improvement at ward level | |
| 1. Evidence or best practices used to implement and evaluate QIP, tailored to ward context | .38* |
| 1. QIP follow cyclical process until objective is achieved | .43 |
| 1. QIP are first tested on limited scale | .49 |
| 1. During QIP objective or expected outcome is set so that results can be evaluated | .43 |
| 1. During QIP results are frequently measured to understand impact of changes | .54 |
| 1. Results QIP are communicated & discussed within team, and changes are made based on results | .59 |
| 1. Relevant information is documented & communicated | .48 |
| 1. Learning & improving is essential part of daily work team | .36* |
| 1. Team effectively use QI methods | .40 |
| 1. Majority of team participated in QIP | .42 |
| 1. During QIP, members with knowledge of process or outcome of QIP is involved | .65 |
| PAF3: context at ward level | |
| 1. Manager thinks long-term and systemic | .54 |
| 1. Manager aligns team objectives with organisational goals | .63 |
| 1. Manager fosters QI culture | .66 |
| 1. Manager is involved in QIP | .71 |
| 1. Manager allocates time for and support QIP | .68 |
| 1. Collaboration within team is characterised by trust | .69 |
| 1. Collaboration within team is characterised by teamwork | .76 |
| 1. Collaboration within team is characterised by willingness to help each other | .77 |
| 1. Collaboration within team is characterised by appreciation of complementary roles | .42 |
| 1. Collaboration within team is characterised by recognition individual contributions to shared purpose | .54 |
| 1. Team members value communication & commitment for QIP | .43 |
| 1. Team members are recognised for improving care | .53 |
| 1. Appreciate each other & use differences for benefit of team | .57 |
| 1. Team listen to contribution of every member | .75 |
| 1. Contribution team member will be considered | .65 |
| 1. Different ideas are considered before decision | .59 |
| 1. Working group or reference nurses are given & take responsibility during QIP | .60 |
| 1. Working group or reference nurses may make decision during QIP | .55 |
| 1. Working group or reference nurses provide feedback and support to team during QIP | .70 |
| 1. Working group or reference nurses apply sufficient knowledge and skills to carry out QIP | .75 |
| PAF4: context in the organisation | |
| 1. Management and nurse middle managers encourage team to execute QIP | .57 |
| 1. Management and nurse middle managers share information with team and between teams to execute QIP | .67 |
| 1. Management and nurse middle managers provide sufficient time and resources to team for QIP | .59 |
| 1. Management and nurse middle managers offer recognition & rewards to team for implementation QIP | .55 |
| 1. Team members receive QI education and training | .26 |
| 1. Organisation have system for data collection & management |  |
| 1. Data for QIP are available & accessible | .39* |
| 1. Our organisation provides support by deploying QI experts | .68 |

* = communalities smaller than cut-off .40
