# Supplementary material for: Development and Validation of an Instrument to Assess Nursing Team Contexts and Competencies regarding Continuous Quality Improvement Culture
Source: Research Square preprint supplement (doi:10.21203/rs.3.rs-7246729/v1), 2025-09-16
Supplement: Supplementary file 3 [file d0132235e2a599461b7a03d2.docx]

**Supplementary file 1: English-language version of Nursing team Context and Competencies regarding Continuous Quality Improvement**

The survey uses a 4-point Likert scale for each statement, ranging from "strongly disagree" to "strongly agree." For readability, we use the abbreviation QI for quality improvement.

| Construct 1: Motivation & Trigger |
| --- |
| 1. Pressures or other incentives from outside my hospital, such as legislation, accreditation, scientific research, training or conferences, motivate members of our team to start QI projects. |
| 1. Scientific evidence or best practices are used to design QI projects, tailored to the context of our own ward. |
| 1. Relevant information or data create support for QI projects. |
| 1. The majority of our team is highly motivated to improve care through QI projects |
| 1. QI projects are relevant to practice. |

| Construct 2: Continuous improvement at ward level |
| --- |
| 1. Scientific evidence or best practices are used to implement and evaluate QI project, tailored to the context of our own ward. |
| 1. QI projects follow a cyclical process. Based on the results or lessons learned, adjustment are made (continuously) during an QI project until the objective is achieved. |
| 1. QI projects are first tested on a limited scale so that results can be fed back, risks are limited, adjustments can be made quickly and we learn from them as a team. |
| 1. During the planning phase of QI projects, an objective or an expected outcome is set so that results can be evaluated and compared with this objective or outcome. |
| 1. During QI projects results are frequently measured to understand the impact of changes on the (care) process or outcome. |
| 1. Results of QI projects are communicated and discussed within our team and changes are made based on the results. |
| 1. Learning and improving (care) is an essential parts of the daily work within our team. |
| 1. The team effectively uses QI methods (such as … ) to make changes. |
| 1. The majority of our team has already participated in improvement projects. |
| 1. During QI projects, team members with knowledge of the (care) process or outcome of the project are involved. |

| Construct 3: Context at ward level |
| --- |
| 1. The nurse manager of the team thinks long-term and of the hospital as a whole. |
| 1. The nurse manager of the team aligns the objectives of the team with organisational (strategic) goals. |
| 1. The nurse manager of the team fosters a quality and improvement. |
| 1. The nurse manager of the team is involved in QI projects. |
| 1. The nurse manager of the team allocates time for and supports QI project. |
| 1. The collaboration within the team is characterized by trust. |
| 1. The collaboration within the team is characterized by team work. |
| 1. The collaboration within the team is characterized by willingness to help each other. |
| 1. The collaboration within the team is characterized by appreciation of complementary roles such as reference nurses. |
| 1. The collaboration within the team is characterized by recognition that all contribute individually to a shared purpose. |
| 1. We appreciated each other and use individual differences for the benefit of the team. |
| 1. Each team member's contribution is listened to within the team. |
| 1. Any contribution from a member of the team will be considered. |
| 1. Different ideas are considered in the team before making a decision. |
| 1. The working group or reference nurses are given and take responsibility during an QI project. |
| 1. The working group or reference nurses may make decisions during QI projects. |
| 1. The working group or reference nurses provide feedback en support to the team during a QI project. |
| 1. The working group or reference nurses apply sufficient knowledge and skills to carry out a QI project. |

| Construct 4: Context in organisation |
| --- |
| 1. Management and nurse middle managers encourage the team to implement QI projects. |
| 1. Management and nurse middle managers share information with the team and between teams to implement QI projects. |
| 1. Management and nurse middle managers provide sufficient time and resources to the team to encourage and implement QI projects. |
| 1. Management and nurse middle managers offer recognition and rewards to the team for the implementation of QI projects. |
| 1. Team members receive education and training to identify and act on QI opportunities. |
| 1. There is a system within the organisation for data collection and management. |
| 1. Data within a QI project are available and accessible due to the existence of (possibly digital) systems or tools for data collection and management. |
| 1. The organisation provides support to the team by deploying QI experts (e.g., Quality department). |
